# Supplementary material for: Uncovering newly identified aldehyde dehydrogenase 2 genetic variants that lead to acetaldehyde accumulation after an alcohol challenge
Source: PubMed Central journal article supplement (PMC11288122; doi:10.1186/s12967-024-05507-x), 2024-07-29
Supplement: 12967_2024_5507_MOESM1_ESM.pdf [file 12967_2024_5507_MOESM1_ESM.pdf]

## SUPPLEMENTAL MATERIAL

for

### Uncovering newly identified aldehyde dehydrogenase 2 genetic variants that lead to acetaldehyde accumulation after an alcohol challenge

Freeborn Rwere<sup>1</sup>, Joseph R. White<sup>1</sup>, Rafaela C.R. Hell<sup>1</sup>, Xuan Yu<sup>1</sup>, Xiaocong Zeng<sup>1</sup>, Leslie McNeil<sup>1</sup>, Kevin N. Zhou<sup>1</sup>, Martin S. Angst<sup>1</sup>, Che-Hong Chen<sup>2</sup>, Daria Mochly-Rosen<sup>2</sup>, Eric R. Gross<sup>1\*</sup>

<sup>1</sup>Department of Anesthesiology, Perioperative and Pain Medicine, School of Medicine, Stanford University, Stanford, CA 94305, USA

<sup>2</sup>Department of Chemical and Systems Biology, School of Medicine, Stanford University, Stanford, CA 94305, USA

**\*Correspondence:** Eric R. Gross, Stanford University, School of Medicine, Department of Anesthesiology, Perioperative and Pain Medicine, Telephone: 650-723-7442, Fax: 650-725-5840, E-mail: [ergross@stanford.edu](mailto:ergross@stanford.edu)

Supplemental Figure 1.

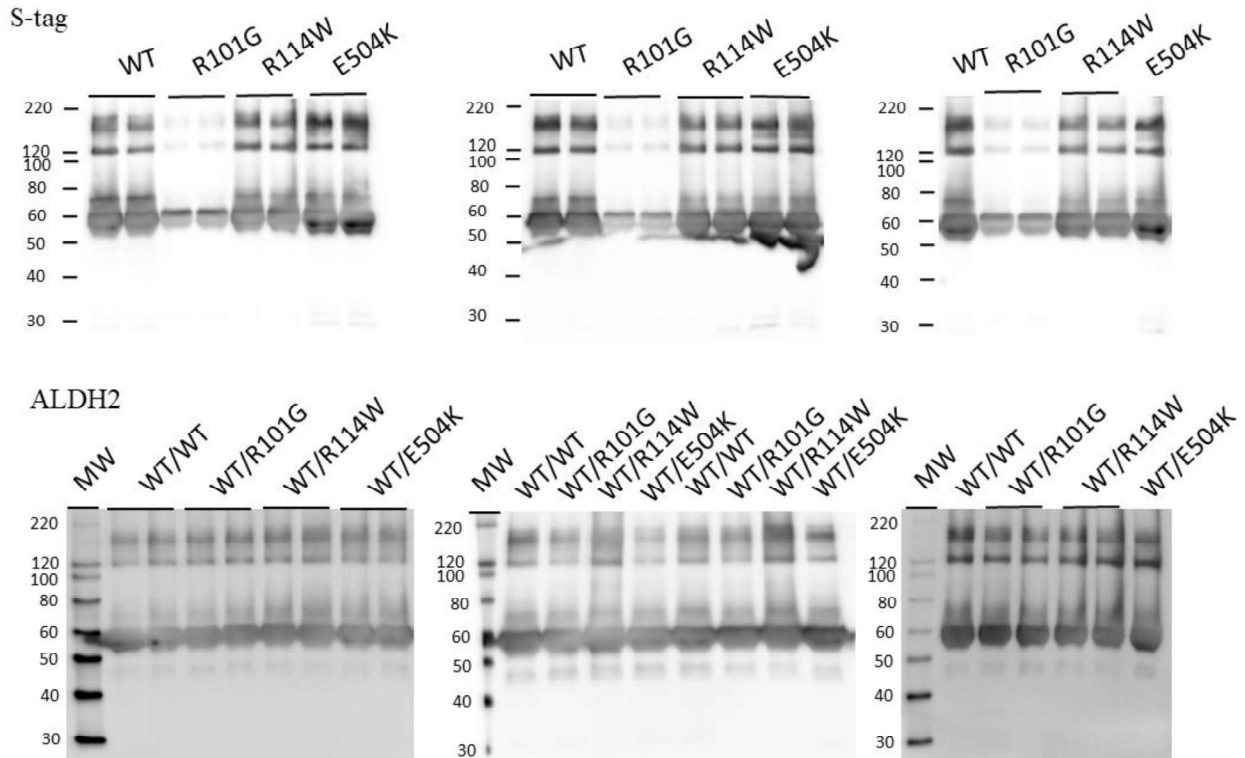

**Supplemental Figure 1.** Western blots for ALDH2 quantification from two different protein batches per enzyme. **A.** S-tag western blots. The R101G variant did not form ALDH2 dimers and a tetramer, whereas other ALDH2 variants expressed in the S-tag site formed dimers and tetramers. **B.** Western blots probed with an ALDH2 antibody. Both ALDH2 dimers and tetramers were detected. MW = molecular weight markers

**Supplemental Table 1.** ALDH2 primers for exome sequencing

| <b>Exon</b> | <b>Forward Primer<br/>(5'- to -3')</b> | <b>Reverse Primer<br/>(5'- to -3')</b> | <b>Amplicon<br/>size/bp</b> | <b>Annealing<br/>temperature/<br/>°C</b> |
|-------------|----------------------------------------|----------------------------------------|-----------------------------|------------------------------------------|
| 1           | TAGCGCCACCCGCTT<br>CGCTTGCATCA         | TGCGGGGGACTCGGGC<br>CGGAAAACAAA        | 351                         | 58                                       |
| 2           | GGTAGTCAGTATTAG<br>GTTGACAGCTGG        | TTAACACCGTTGTCTGC<br>AGACAAG           | 311                         | 58                                       |
| 3           | TGTGCAGCGATATGC<br>TGATGACC            | GCTGCGAGCCTATTCA<br>CCACAT             | 283                         | 58                                       |
| 4           | TTGGAGAGACCATG<br>GCAATAGTCCAG         | TTACCTCCTAACAACG<br>TTGCCTCCC          | 324                         | 58                                       |
| 5           | CAGAAAGACTCAGC<br>TGGACCAGTTTG         | TTGTCAGAGCCCATCTT<br>CTTACCTGCC        | 344                         | 58                                       |
| 6           | CCAGTGTAGTTCTCT<br>GAGGAAGCT           | TAAGAGGGAGCCACTC<br>TGGTTCACAT         | 332                         | 58                                       |
| 7           | GACCACATGTGTCCT<br>TGGCAGA             | GGAGCTCACCTTGAGC<br>ATGTCGT            | 318                         | 58                                       |
| 8           | TCTCTCGTGGTCCAG<br>TTGCTCACT           | ACAGCAACCAACGCCA<br>TTGGGCA            | 328                         | 58                                       |
| 9           | AGCAGGCATCAACC<br>CTTACAGT             | TTCTCATGCTGGCTCTA<br>GACA              | 347                         | 58                                       |

|    |                                 |                                |     |    |
|----|---------------------------------|--------------------------------|-----|----|
| 10 | CTGCATAATTCTAAG<br>CCTGAAGCCT   | CATCAGGATGCCAGGC<br>TGAAGTGT   | 318 | 58 |
| 11 | TTCCCCTGGAAGTGT<br>TAGAGCATGGCT | ATTCCAGGATGGTGAC<br>CACCAGATTC | 376 | 58 |
| 12 | GTCCTGGGAGTGTA<br>A<br>CCCATAA  | AACAGACCCCAATCCC<br>CCAGCA     | 266 | 58 |

**Supplemental Table 2.** Demographics including age, weight, and sex of participants given an alcohol challenge

|                        | Wild type | <i>rs671</i> | <i>rs747096195</i> | <i>rs190764869</i> |
|------------------------|-----------|--------------|--------------------|--------------------|
| Number of participants | 8         | 8            | 1                  | 1                  |
| Age (years)            | 28±2      | 29±2         | 60                 | 25                 |
| Weight (pounds)        | 147±8     | 146±8        | 138                | 143                |
| Gender (Male/Female)   | 4/4       | 4/4          | 0/1                | 0/1                |
| Smoker                 | None      | None         | None               | None               |

**Supplemental Table 3.** Soft ionization parameters for selective ion flow mass spectrometry

| <b>Metabolite</b> | <b>Reagent Ion</b>            | <b>Reaction Ratio</b>  | <b>Mass (m/z)</b> |
|-------------------|-------------------------------|------------------------|-------------------|
| Acetaldehyde      | H <sub>3</sub> O <sup>+</sup> | 3.7 x 10 <sup>-9</sup> | 45, 63            |
|                   | NO <sup>+</sup>               | 6.0 x 10 <sup>-9</sup> | 43, 61            |

**Supplemental Table 4.** Sequences of oligonucleotide primers used to mutate ALDH2

| <b>ALDH2</b> | <b>Forward Primer<br/>(5'- to -3')</b>    | <b>Reverse Primer<br/>(5'- to -3')</b>    | <b>Amplicon<br/>size/bp</b> | <b>Annealing<br/>temperature</b> |
|--------------|-------------------------------------------|-------------------------------------------|-----------------------------|----------------------------------|
| R101G        | GACGCATCACACGGGGG<br>CCGGCTGCTG           | CAGCAGCCGGCCCCC<br>GTGTGATGCGTC           | 27                          | 55°C                             |
| R114W        | CTGATCGAGTGG GAC<br>CGGACCTACCTGGCG       | CGCCAGGTAGGTCCA<br>GTCCCGCTCGATCAG        | 30                          | 55°C                             |
| E504K        | GGGCTGCAG GCATAC<br>ACTAAGGTGAAACTGT<br>C | GACAGTTTTCACCTT<br>AGTGTATGCCTGCAG<br>CCC | 33                          | 55°C                             |
